# Supplementary material
Source: publisher site journal article supplement (https://www.dovepress.com/article/474344)
Supplement: Supplementary file 1 [file get_supplementary_file.php]

**SUPPLEMENTARY MATERIALS**

**A role for systemic inflammation in stroke-associated infection and the long-term prognosis of acute ischemic stroke: a mediation analysis**

**Authors:**

Suwen Huang1§, Wei Xie1,2§, Yufan Gao1,3§, Yining Jin1,3, Yilin Chen1,2, Guoliang Zhou1,2, Feng Chen1,2, Qiaoqiao Jin1,2, Zihao Wu1,2, Lingsheng Wang1,2, Chao Chen4, Yiyun Weng1, Guangyong Chen5

**Institutions:**

1Department of Neurology, The First Affiliated Hospital of Wenzhou Medical University, Wenzhou, Zhejiang, China

2The First School of Medicine, School of Information and Engineering, Wenzhou Medical University, Wenzhou, China

3The Second School of Medicine, Wenzhou Medical University, Wenzhou, China

4Department of Nutriology, The Third Affiliated Hospital of Wenzhou Medical University, Wenzhou, Zhejiang, China

5Department of Neurology, The Third Affiliated Hospital of Wenzhou Medical University, Wenzhou, China

§Co-first author: Suwen Huang, Wei Xie and Yufan Gao

Corresponding author: Guangyong Chen and Yiyun Weng

Guangyong Chen, Department of Neurology, The Third Affiliated Hospital of Wenzhou Medical University, Wenzhou, China. E-mail: gychen@wmu.edu.cn.

Yiyun Weng, Department of Neurology, The First Affiliated Hospital of Wenzhou Medical University, Wenzhou, Zhejiang, China. E-mail: wengyiyun2012@126.com.

**Supplemental Tables**

**Supplementary Table 1.** Baseline characteristics of subjects divided by mRS at 1 year in the validation studies.

| **Characteristics** |  | **Total (*n* = 536)** | **mRS 0-2 (*n* =354)** | **mRS 3-6 (*n* = 182)** | ***p*-value** |
| --- | --- | --- | --- | --- | --- |
| **Demographic characteristics** | | |  |  | |
| Age (years) |  | 69 (60-78) | 65 (57-74) | 76 (68-84) | <0.001 |
| Sex (male), *n* (%) |  | 341 (63.62) | 237 (66.95) | 104 (57.14) | 0.058 |
| Smoking, *n* (%) |  | 126 (23.51) | 98 (27.68) | 28 (15.38) | 0.002 |
| Drinking, *n* (%) |  | 256 (47.76) | 184 (51.98) | 72 (39.56) | 0.008 |
| **Clinical status** |  |  |  |  |  |
| NIHSS at admission |  | 4.00 (2.00, 6.00) | 3.00 (2.00, 4.00) | 6.00 (4.00, 8.00) | <0.001 |
| **Medical history** |  |  |  |  |  |
| Hypertension, *n* (%) |  | 400 (74.63) | 255 (72.03) | 145 (79.67) | 0.069 |
| Diabetes, *n* (%) |  | 304 (64.00) | 190 (63.97) | 114 (64.04) | 0.629 |
| Previous stroke, *n* (%) |  | 106 (19.78) | 52 (14.69) | 54 (29.67) | <0.001 |
| CAD, *n* (%) |  | 17 (3.17) | 9 (2.54) | 8 (4.40) | 0.369 |
| [AF](https://fanyi.so.com/?src=onebox#atrial fibrillation), *n* (%) |  | 20 (3.73) | 10 (2.82) | 10 (5.49) | 0.192 |
| **TOAST subtype** |  |  |  |  | / |
| LAA, *n* (%) |  | N/A | N/A | N/A |  |
| SAO, *n* (%) |  | N/A | N/A | N/A |  |
| CE, *n* (%) |  | N/A | N/A | N/A |  |
| Others, *n* (%) |  | N/A | N/A | N/A |  |
| **Laboratory testing** |  |  |  |  |  |
| Neutrophils (109/L) |  | 4.10 (3.30-5.40) | 3.80 (3.20-4.90) | 4.90 (3.80-6.70) | <0.001 |
| Lymphocytes (109/L) |  | 1.70 (1.30-2.10) | 1.70 (1.33-2.10) | 1.50 (1.10-2.00) | 0.001 |
| Monocytes (109/L) |  | 0.50 (0.40-0.60) | 0.50 (0.40-0.60) | 0.60 (0.40-0.70) | <0.001 |
| Platelets (109/L) |  | 204.00 (172.00-250.00) | 203.00 (172.00-246.75) | 205.00 (172.00-258.50) | 0.826 |
| SIRI |  | 1.30 (0.80-2.00) | 1.15 (0.80-1.60) | 1.80 (1.10-3.08) | <0.001 |
| SII |  | 530.20 (361.05-798.50) | 488.10 (338.25-673.40) | 672.20 (437.85-1012.25) | <0.001 |
| SAI, *n* (%) |  | 43 (8.02) | 19 (5.37) | 24 (13.19) | 0.003 |

Abbreviations: mRS, modified Ranking Scale; NIHSS, National Institutes of Health Stroke Scale; CAD, coronary artery disease; AF, atrial fibrillation; TOAST, trial of org 10172 in acute stroke treatment; LAA, large artery atherosclerosis; SAO, small artery occlusion; CE, cardioembolism; SIRI, systemic inflammation response index; SII, systemic immune inflammation index.

**Supplementary Table 2.** Univariate logistic regression analysis for outcomes at 1 year.

| **Variables** | **Poor functional outcome (mRS 3-6)** | |  | **Mortality** | |  | **Functional dependency (BI < 60)** | |
| --- | --- | --- | --- | --- | --- | --- | --- | --- |
| **OR (95% CI)** | ***p***-value |  | **HR (95% CI)** | ***p***-value |  | **OR (95% CI)** | ***p***-value |
| Age (years) | 1.098 (1.080-1.116) | < 0.001 |  | 1.130 (1.097-1.165) | < 0.001 |  | 1.106 (1.085-1.128) | < 0.001 |
| Sex (male), *n* (%) | 0.812 (0.605-1.090) | 0.166 |  | 0.935 (0.549-1.594) | 0.806 |  | 0.727 (0.516-1.026) | 0.069 |
| Smoking, *n* (%) | 0.548 (0.388-0.775) | < 0.001 |  | 0.545 (0.283-1.049) | 0.069 |  | 0.566 (0.374-0.856) | 0.007 |
| Drinking, *n* (%) | 0.730 (0.521-1.022) | 0.066 |  | 0.481 (0.236-0.978) | 0.043 |  | 0.559 (0.364-0.858) | 0.008 |
| NIHSS at admission | 1.301 (1.252-1.353) | < 0.001 |  | 1.218 (1.172-1.267) | < 0.001 |  | 1.281 (1.230-1.334) | < 0.001 |
| Medical history |  |  |  |  |  |  |  |  |
| Hypertension, *n* (%) | 1.599 (1.165-2.194) | 0.004 |  | 1.217 (0.699-2.118) | 0.488 |  | 1.613 (1.103-2.359) | 0.014 |
| Diabetes, *n* (%) | 1.404 (1.039-1.897) | 0.027 |  | 0.981 (0.559-1.724) | 0.947 |  | 1.400 (0.982-1.994) | 0.063 |
| Previous stroke, *n* (%) | 1.951 (1.344-2.833) | < 0.001 |  | 1.750 (0.929-3.299) | 0.084 |  | 2.205 (1.451-3.352) | < 0.001 |
| CAD, *n* (%) | 3.743 (1.775-7.893) | < 0.001 |  | 2.441 (0.764-7.798) | 0.132 |  | 2.830 (1.231-6.505) | 0.014 |
| [AF, *n* (%)](#atrial fibrillation) | 2.400 (1.436-4.012) | < 0.001 |  | 2.364 (1.074-5.203) | 0.033 |  | 3.085 (1.785-5.332) | < 0.001 |
| TOAST subtype |  |  |  |  |  |  |  |  |
| LAA, *n* (%) | Ref. |  |  | Ref. |  |  | Ref. |  |
| SAO, *n* (%) | 0.285 (0.169-0.481) | < 0.001 |  | 0.185 (0.044-0.776) | 0.021 |  | 0.106 (0.038-0.290) | < 0.001 |
| CE, *n* (%) | 2.211 (1.554-3.146) | < 0.001 |  | 3.003 (1.713-5.266) | < 0.001 |  | 2.435 (1.643-3.609) | < 0.001 |
| Others, *n* (%) | 1.234 (0.633-2.405) | 0.537 |  | 3.562 (1.560-8.130) | 0.003 |  | 1.830 (0.911-3.674) | 0.089 |
| SIRI (per 1 SD) | 1.952 (1.677-2.272) | < 0.001 |  | 1.479 (1.364-1.603) | < 0.001 |  | 1.870 (1.613-2.168) | < 0.001 |
| SII (per 1 SD) | 1.906 (1.580-2.300) | < 0.001 |  | 1.245 (1.168-1.328) | < 0.001 |  | 1.869 (1.541-2.268) | < 0.001 |
| SAI, *n* (%) | 5.121 (3.500-7.492) | < 0.001 |  | 6.554 (3.898-11.021) | < 0.001 |  | 6.149 (4.095-9.232) | < 0.001 |

**Abbreviations:** OR, odds ratio; HR, hazard ratios; CI, confidence interval; NIHSS, National Institute of Health Stroke Scale; CAD, coronary artery disease; AF, atrial fibrillation; TOAST, trial of org 10172 in acute stroke treatment; LAA, large artery atherosclerosis; SAO, small artery occlusion; CE, cardio-embolism; SIRI, systemic inflammation response index; SII, systemic immune inflammation index; SAI, stroke-associated infection; mRS, modified ranking scale; BI, barthel index; SD, standard deviation.

**Supplementary Table 3.** Multivariate regression analysis for systemic inflammation markers with outcomes at 1 year in validation study.

| **Outcomes** | **Groups** | **SIRI** | |  | **SII** | |
| --- | --- | --- | --- | --- | --- | --- |
| **OR/HR (95% CI)** | ***p*-value** |  | **OR/HR (95% CI)** | ***p*-value** |
| Poor functional outcome† | Q1 | Ref. |  |  | Ref. |  |
| Q2 | 1.250 (0.642-2.434) | 0.512 |  | 1.370 (0.709-2.650) | 0.349 |
| Q3 | 2.105 (1.094-4.052) | 0.026 |  | 1.619 (0.850-3.083) | 0.143 |
| Q4 | 3.146 (1.604-6.169) | 0.001 |  | 2.502 (1.310-4.777) | 0.005 |
| Q4 vs. Q1-3 | 2.200 (1.299-3.726) | 0.003 |  | 1.895 (1.139-3.153) | 0.014 |
| Per 1 SD | 1.307 (1.007-1.698) | 0.044 |  | 1.155 (0.930-1.436) | 0.193 |
| *p* for trend |  | < 0.001 |  |  | 0.005 |
| Mortality† | Q1 | Ref. |  |  | Ref. |  |
| Q2 | 0 (2.3221E-159-8.535E+147) | 0.945 |  | 10760.971(7.0614E-88-1.64E+95) | 0.931 |
| Q3 | 0 (1.1776E-149-2.158E+138) | 0.942 |  | 13223.3(8.703E-88-2.009E+95) | 0.929 |
| Q4 | 0.264 (0.053-1.305) | 0.102 |  | 82897.464 (5.4808E-87-1.254E+96) | 0.916 |
| Q4 vs. Q1-3 | 10.392 (2.073-52.094) | 0.004 |  | 9.450 (2.185-40.863) | 0.003 |
| Per 1 SD | 1.335 (1.040-1.712) | 0.023 |  | 1.560 (1.158-2.103) | 0.003 |
| *p* for trend |  | 0.010 |  |  | 0.008 |
| Functional dependency† | Q1 | Ref. |  |  | Ref. |  |
| Q2 | 0.783 (0.212-2.899) | 0.715 |  | 0.532 (0.131-2.155) | 0.376 |
| Q3 | 1.410 (0.451-4.409) | 0.555 |  | 1.399 (0.477-4.101) | 0.540 |
| Q4 | 2.291 (0.779-6.733) | 0.132 |  | 1.952 (0.697-5.463) | 0.203 |
| Q4 vs. Q1-3 | 0.783 (0.212-2.899) | 0.715 |  | 1.936 (0.916-4.094) | 0.084 |
| Per 1 SD | 1.410 (0.451-4.409) | 0.555 |  | 1.104 (0.818-1.489) | 0.520 |
| *p* for trend |  | 0.059 |  |  | 0.076 |
| SAI* | Q1 | Ref. |  |  | Ref. |  |
|  | Q2 | 2.063 (0.605-7.040) | 0.247 |  | 1.639 (0.559-4.808) | 0.368 |
|  | Q3 | 2.352 (0.669-8.270) | 0.183 |  | 1.148 (0.372-3.542) | 0.810 |
| Q4 | 4.108 (1.263-13.362) | 0.019 |  | 2.265 (0.802-6.396) | 0.123 |
| Q4 vs. Q1-3 | 2.264 (1.078-4.756) | 0.031 |  | 1.811 (0.875-3.751) | 0.110 |
| Per 1 SD | 1.262 (0.996-1.599) | 0.054 |  | 1.302 (1.007-1.681) | 0.044 |
| *p* for trend |  | 0.015 |  |  | 0.175 |

Quartiles of SIRI: Q1, < 0.80; Q2, 0.80-1.30; Q3, 1.30-2.00; and Q4, > 2.00. Quartiles of SII: Q1, < 360.70; Q2, 360.70-530.20; Q3, 530.20-799.00; and Q4, > 799.00.

†Adjusted for age, sex, NIHSS at admission, smoking, drinking, hypertension, diabetes, previous stroke, CAD, AF, SAI and TOAST subtype.

*Adjusted for age, sex, NIHSS at admission, smoking, drinking, hypertension, diabetes, previous stroke, CAD, AF and TOAST subtype.

**Abbreviations:** OR, odds ratio; HR, hazard ratios; CI, confidence interval; NIHSS, National Institute of Health Stroke Scale; TOAST, trial of org 10172 in acute stroke treatment; CAD, coronary artery disease; AF, atrial fibrillation; SIRI, systemic inflammation response index; SII, systemic immune inflammation index; SD, standard deviation; SAI, stroke-associated infection

**Supplementary Table 4.** Baseline characteristics of subjects divided by mRS at 1 year after 1:1 PSM.

| **Characteristics** | **Total (*n*=650)** | **PSM adjusted (1:1)** | | ***p*-value** |
| --- | --- | --- | --- | --- |
| **mRS 0-2 (*n* =325)** | **mRS 3-6 (*n* = 325)** |
| **Demographic characteristics** | |  | | |
| Age (years) | 75.00 (68.00-81.00) | 74.00 (68.00-81.00) | 75.00 (68.00-82.00) | 0.714 |
| Sex (male), *n* (%) | 391 (60.15) | 196 (60.31) | 195 (60.00) | 1.000 |
| Smoking, *n* (%) | 124 (19.08) | 60 (18.46) | 64 (19.69) | 0.765 |
| Drinking, *n* (%) | 198 (30.46) | 98 (30.15) | 100 (30.77) | 0.932 |
| **Clinical status** |  |  |  |  |
| NIHSS at admission | 6.00 (4.00-8.00) | 5.00 (4.00-8.00) | 6.00 (4.00-8.00) | 0.180 |
| **Medical history** |  |  |  |  |
| Hypertension, *n* (%) | 487 (74.92) | 242 (74.46) | 245 (75.38) | 0.856 |
| Diabetes, *n* (%) | 225 (34.62) | 110 (33.85) | 115 (35.38) | 0.742 |
| Previous stroke, *n* (%) | 130 (20.00) | 66 (20.31) | 64 (19.69) | 0.922 |
| CAD, *n* (%) | 27 (4.15) | 14 (4.31) | 13 (4.00) | 1.000 |
| [AF](https://fanyi.so.com/?src=onebox#atrial fibrillation), *n* (%) | 51 (7.85) | 27 (8.31) | 24 (7.38) | 0.770 |
| **Laboratory testing** |  |  |  |  |
| SIRI | 1.49 (0.91-2.40) | 1.30 (0.82-1.90) | 1.75 (1.04-2.90) | <0.001 |
| SII | 592.75 (398.03-903.84) | 550.09 (358.23-770.00) | 662.16 (423.70-1035.00) | <0.001 |
| SAI, *n* (%) | 97 (14.92) | 47 (14.46) | 50 (15.38) | 0.826 |

**Abbreviations:** NIHSS, National Institute of Health Stroke Scale; CAD, coronary artery disease; AF, atrial fibrillation; SIRI, systemic inflammation response index; SII, systemic immune inflammation index; SAI, stroke-associated infection; mRS, modified ranking scale.

**Supplementary Table 5.** Conditional Logistic Regression Analysis for outcomes at 1 year after 1:1 PSM.

| **Outcomes** | **Groups** | **SIRI** | |  | | **SII** | | |
| --- | --- | --- | --- | --- | --- | --- | --- | --- |
| **OR/HR (95% CI)** | ***p*-value** | |  | | **OR/HR (95% CI)** | ***p*-value** |
| Poor functional outcome† | Q1 | Ref. |  | |  | | Ref. |  |
| Q2 | 1.256 (0.902-1.748) | 0.177 | |  | | 1.339 (0.982-1.826) | 0.065 |
| Q3 | 1.743 (1.283-2.369) | < 0.001 | |  | | 1.399 (1.025-1.909) | 0.034 |
| Q4 | 2.318 (1.726-3.113) | < 0.001 | |  | | 1.991 (1.492-2.657) | < 0.001 |
| Q4 vs. Q1-3 | 1.757 (1.418-2.177)) | < 0.001 | |  | | 1.613 (1.300-2.001) | < 0.001 |
| Per 1 SD | 1.203 (1.123-1.288) | < 0.001 | |  | | 1.194 (1.110-1.284) | < 0.001 |
| *p* for trend |  |  | |  | |  | < 0.001 |
| Mortality† | Q1 | Ref. |  | |  | | Ref. |  |
| Q2 | 3.510 (0.966-12.755) | 0.056 | |  | | 1.019 (0.357-2.905) | 0.972 |
| Q3 | 2.342 (0.586-9.366) | 0.229 | |  | | 1.744 (0.687-4.430) | 0.242 |
| Q4 | 11.308 (3.422-37.365) | < 0.001 | |  | | 3.342 (1.405-7.950) | 0.006 |
| Q4 vs. Q1-3 | 5.005 (2.770-9.045) | < 0.001 | |  | | 2.667 (1.476-4.819) | 0.001 |
| Per 1 SD | 1.416 (1.247-1.609) | < 0.001 | |  | | 1.219 (1.108-1.342) | < 0.001 |
| *p* for trend |  | < 0.001 | |  | |  | 0.002 |
| Functional dependency† | Q1 | Ref. |  | |  | | Ref. |  |
| Q2 | 1.915 (1.056-3.473) | 0.032 | |  | | 1.321 (0.743-2.348) | 0.343 |
| Q3 | 1.652 (0.900-3.031) | 0.105 | |  | | 1.492 (0.854-2.606) | 0.160 |
| Q4 | 3.316 (1.923-5.720) | < 0.001 | |  | | 2.443 (1.470-4.061) | 0.001 |
| Q4 vs. Q1-3 | 2.196 (1.546-3.119) | < 0.001 | |  | | 1.929 (1.354-2.748) | < 0.001 |
| Per 1 SD | 1.221 (1.110-1.343) | < 0.001 | |  | | 1.207 (1.100-1.326) | < 0.001 |
| *p* for trend |  | < 0.001 | |  | |  | < 0.001 |

SIRI: Q1, < 0.90; Q2, 0.90-1.46; Q3, 1.46-2.41; and Q4, > 2.41. SII: Q1, < 397.60; Q2, 397.60-586.91; Q3, 586.91-905.27; and Q4, > 905.27.

†Adjusted for age, sex, NIHSS at admission, smoking, drinking, hypertension, diabetes, previous stroke, CAD, AF, SAI and TOAST subtype.

**Abbreviations:** OR, odds ratio; HR, hazard ratios; CI, confidence interval; SIRI, systemic inflammation response index; SII, systemic immune inflammation index.

**Supplementary Table 6.** Multivariate regression analysis for systemic inflammation markers (per 1 SD) of cluster1 and 2 (stable or downward trend) with outcomes.

| **Groups** | **SIRI** | |  | **SII** | |
| --- | --- | --- | --- | --- | --- |
| **OR/HR (95% CI)** | ***p*-value** |  | **OR/HR (95% CI)** | ***p*-value** |
| Poor functional outcome | 1.289 (1.094-1.519) | 0.002 |  | 1.274 (1.064-1.524) | 0.008 |
| Mortality | 1.684 (1.309-2.166) | < 0.001 |  | 1.324 (0.763-2.300) | 0.318 |
| Functional dependency | 1.248 (1.028-1.514) | 0.025 |  | 1.238 (1.011-1.516) | 0.039 |

Adjusted for age, sex, NIHSS on admission, smoking, drinking, hypertension, diabetes, previous stroke, CAD, and AF.

**Abbreviations:** OR, odds ratio; HR, hazard ratios; CI, confidence interval; SIRI, systemic inflammation response index; SII, systemic immune inflammation index.

**Supplementary Table 7.** Mediation analysis of systemic inflammation markers for mortality through SAI stratified by prespecified subgroups at 1 year.

| **Subgroups** | **SIRI** | |  | **SII** | |
| --- | --- | --- | --- | --- | --- |
| **Percentage Mediated (95% CI)** | ***p*-value** |  | **Percentage Mediated (95% CI)** | ***p*-value** |
| Age (≥ 65) | 12.79 (3.64-33.49) | 0.012 |  | 6.97 (0.53-20.40) | 0.040 |
| Sex (Male) | 25.34 (-54.11-138.26) | 0.068 |  | 16.90 (-34.28-104.14) | 0.066 |
| Hypertension | 14.61 (-0.63-56.17) | 0.060 |  | 15.72 (3.92-8.88) | 0.044 |
| Diabetes | 22.77 (-76.83-116.09) | 0.080 |  | 10.22 (-14.02-52.29) | 0.144 |

Adjusted for age, sex, NIHSS on admission, smoking, drinking, hypertension, diabetes, previous stroke, CAD, and AF.

**Abbreviations:** CI, confidence interval; SIRI, systemic inflammation response index; SII, systemic immune inflammation index; SAI, stroke-associated infection.

**Supplementary Table 8.** Mediation analysis of systemic inflammation markers for functional dependency through SAI stratified by prespecified subgroups at 1 year.

| **Subgroups** | **SIRI** | |  | **SII** | |
| --- | --- | --- | --- | --- | --- |
| **Percentage Mediated (95% CI)** | ***p*-value** |  | **Percentage Mediated (95% CI)** | ***p*-value** |
| Age (≥ 65) |  |  |  |  |  |
| Yes | 14.44 (4.50-31.39) | < 0.001 |  | 6.97 (1.79-17.07) | < 0.001 |
| No | 20.54 (7.89-44.64) | 0.004 |  | 20.54 (8.61-44.12) | 0.004 |
| Sex (Male) |  |  |  |  |  |
| Yes | 9.82 (1.50-21.16) | 0.020 |  | 6.31 (0.95-13.42) | 0.024 |
| No | 26.07 (5.16-176.11) | 0.044 |  | 17.28 (1.05-124.04) | 0.048 |
| Hypertension | |  |  |  |  |
| Yes | 9.07 (2.82-19.95) | < 0.001 |  | 7.01 (1.93-15.73) | < 0.001 |
| No | 48.16 (13.17-193.11) | 0.024 |  | 29.98 (7.85-137.39) | 0.020 |
| Diabetes |  |  |  |  |  |
| Yes | 14.34 (3.97-39.81) | 0.004 |  | 14.48 (4.12-40.70) | 0.004 |
| No | 16.26 (5.26-35.20) | < 0.001 |  | 6.32 (0.35-16.15) | 0.036 |

Adjusted for age, sex, NIHSS on admission, smoking, drinking, hypertension, diabetes, previous stroke, CAD, and AF.

Abbreviations: CI, confidence interval; SIRI, systemic inflammation response index; SII, systemic immune inflammation index; SAI, stroke-associated infection.

**Supplemental Figures**

**
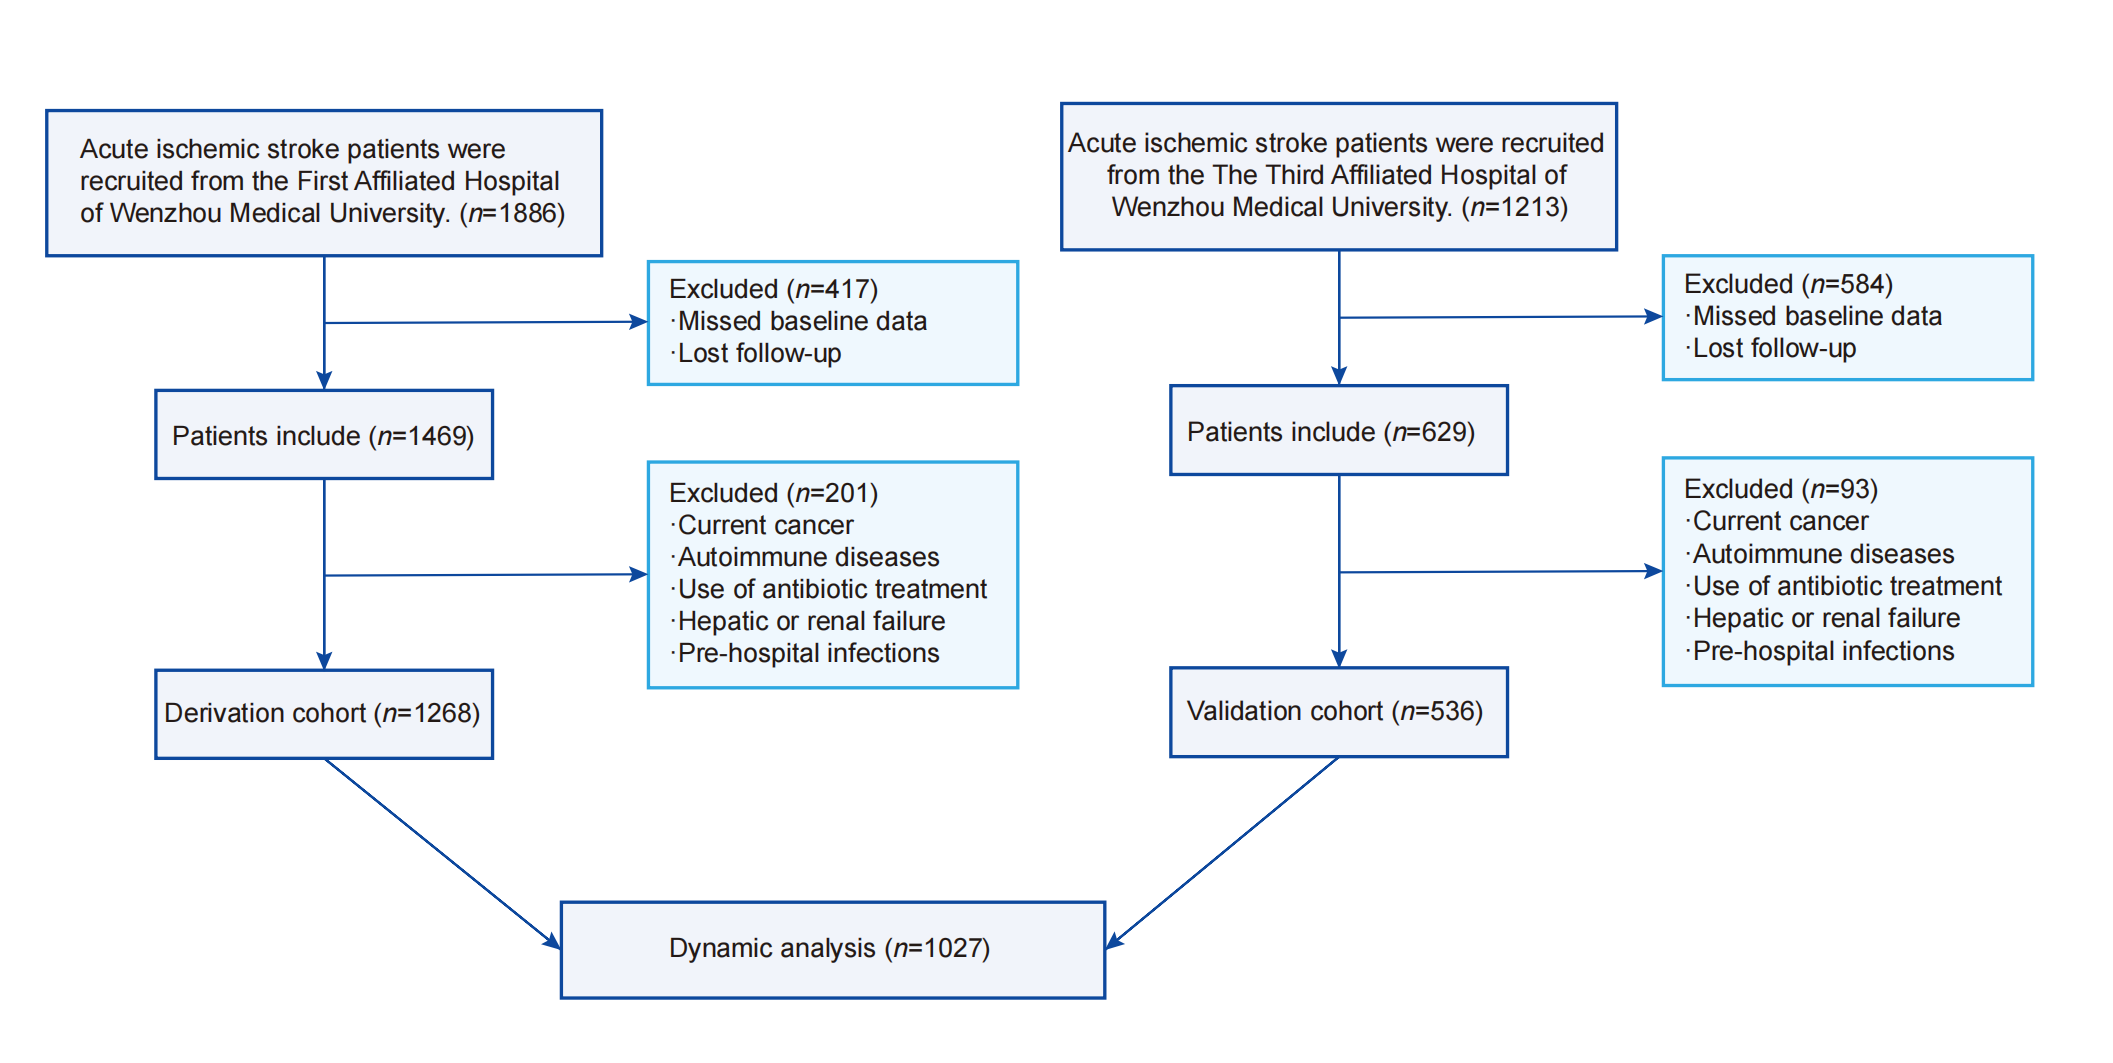
**

**Supplementary Figure 1.** The flow chart of patients’ selection.


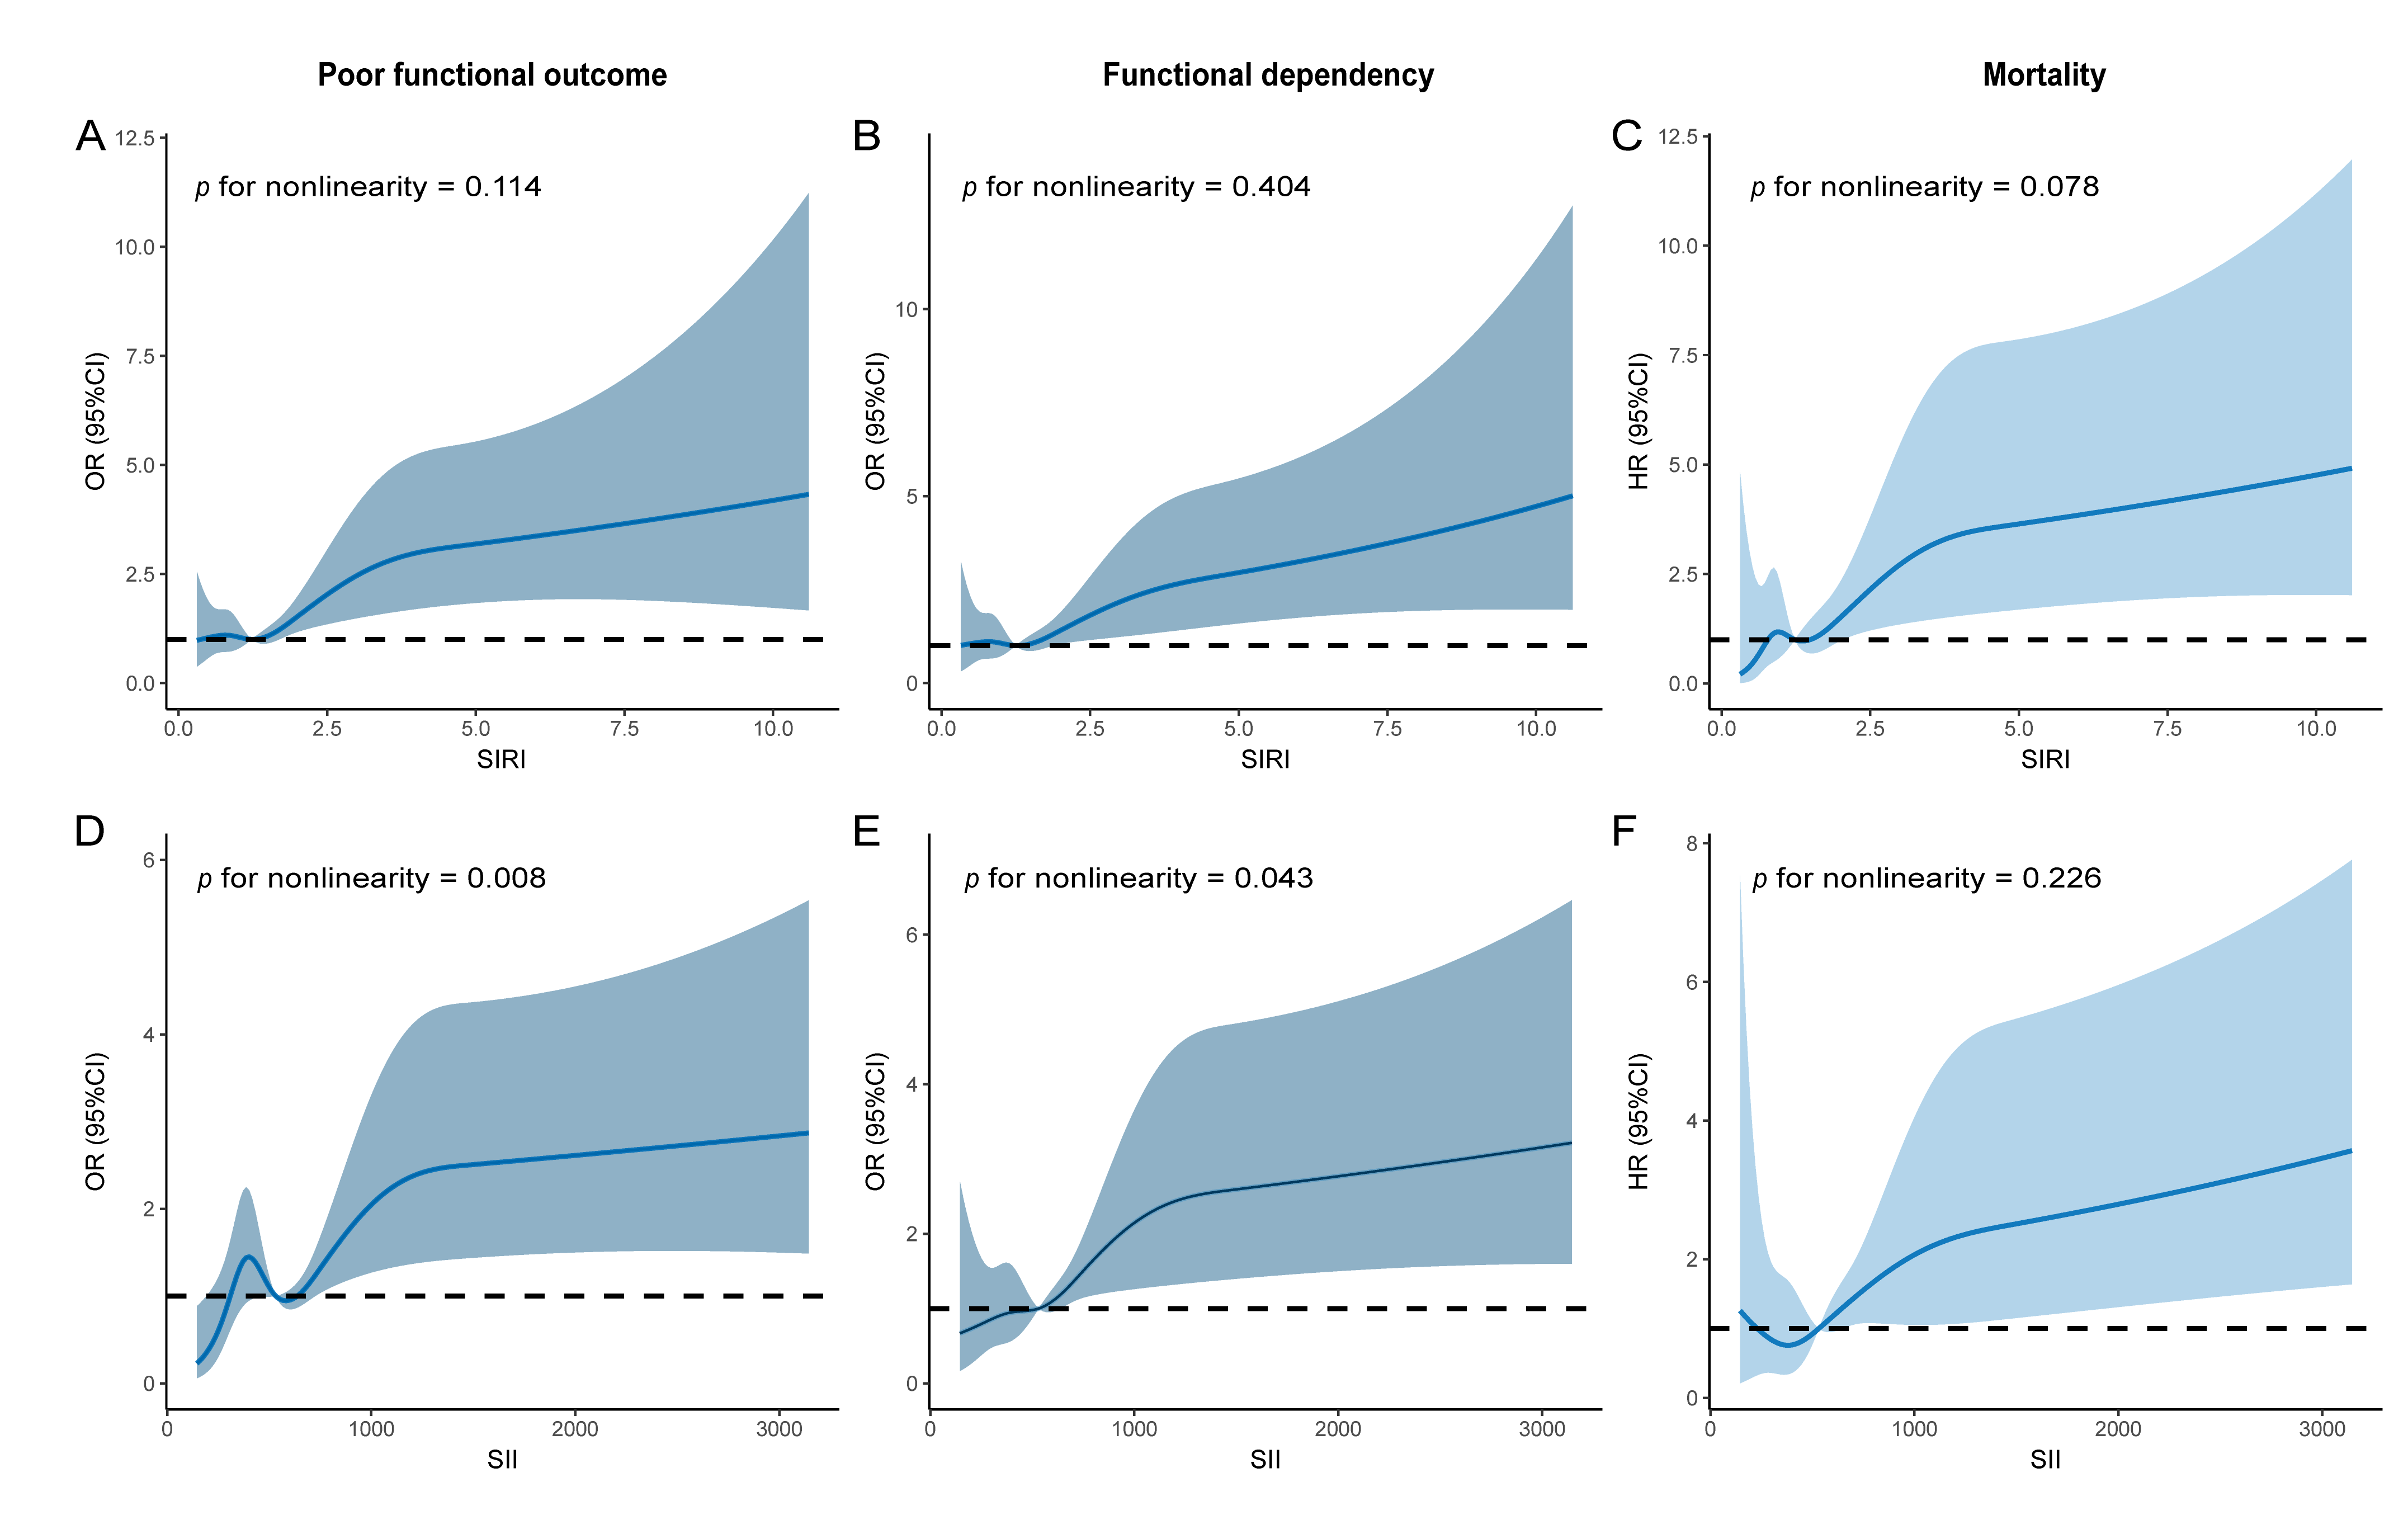


**Supplementary Figure 2.** Adjusted association of SIRI and SII with poor functional outcome (A and D), functional dependency (B and E), mortality (C and F) in derivation study at 1 year by using restricted cubic spline with five knots (at the 5th, 27.5th, 50th, 72.5th, 95th percentiles). Data were adjusted for the confounders mentioned above. **Abbreviations:** OR, odds ratio; HR, hazard ratios; CI, confidence interval; SIRI, systemic inflammation response index; SII, systemic immune inflammation index; BI, barthel index.


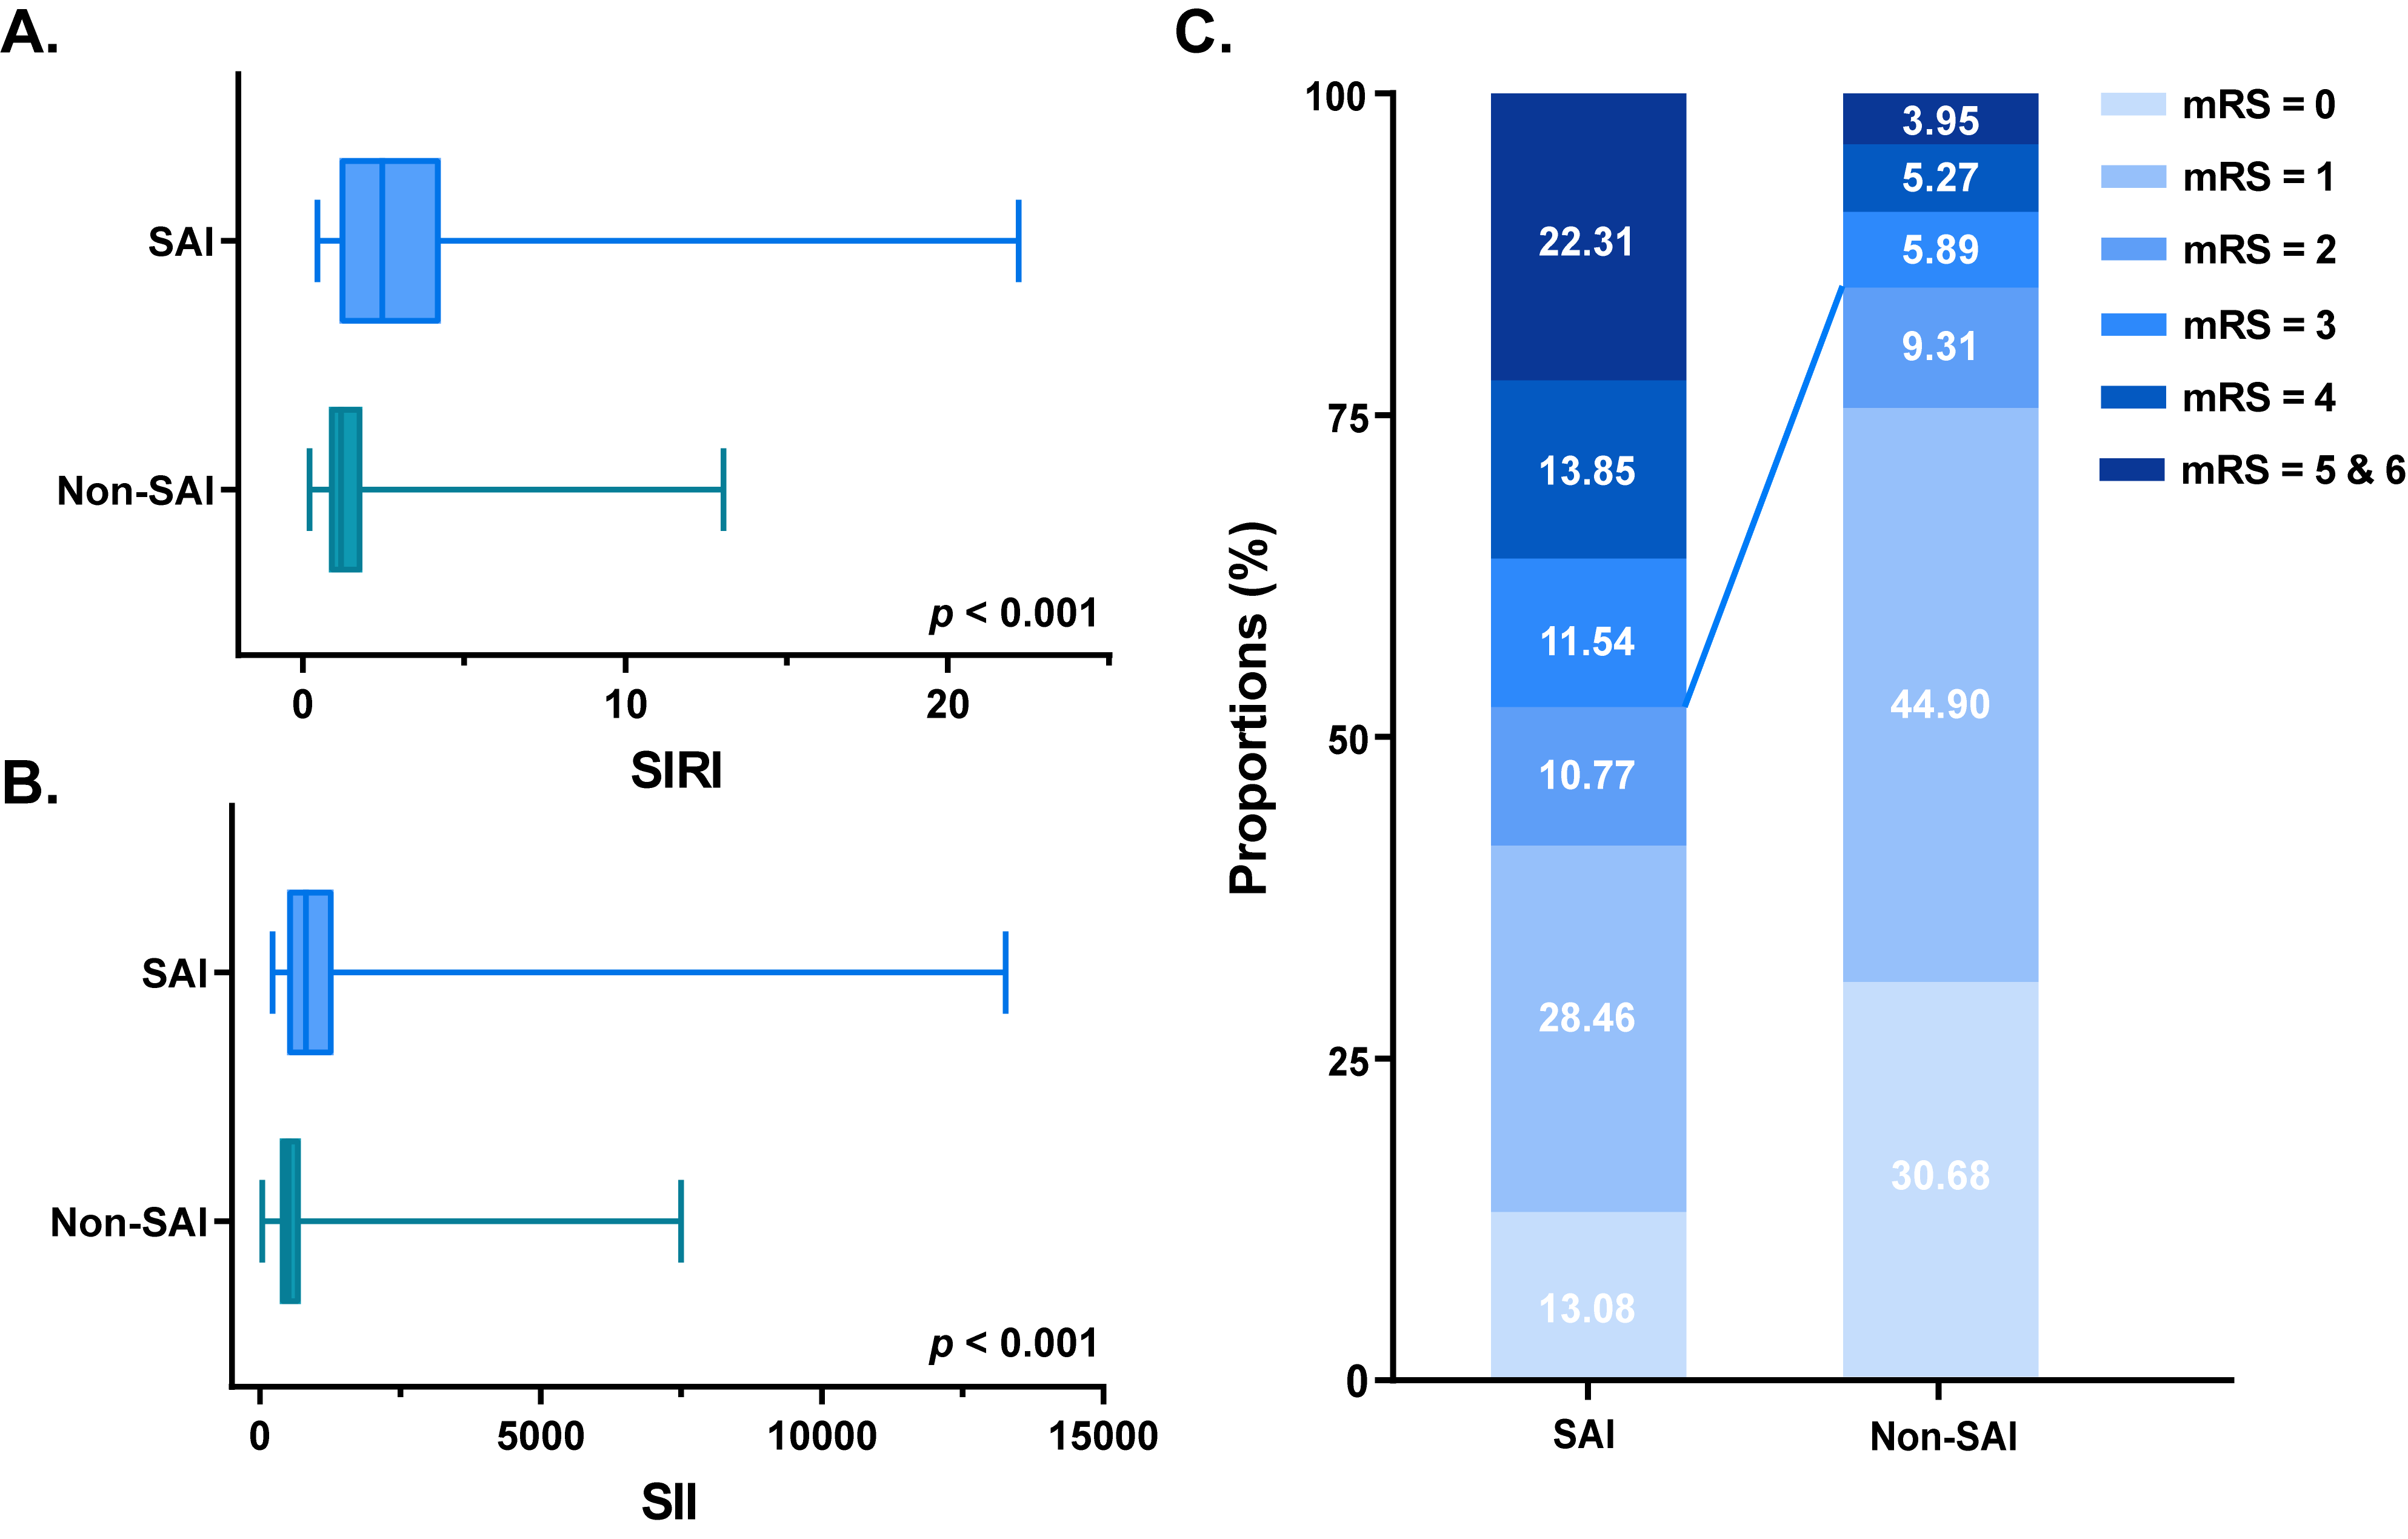


**Supplementary Figure 3.** The differences in SIRI and SII levels of patients with vs without SAI (A and B), as well as the differences in mRS at 1 year of patients with vs without SAI (C) in derivation study.

**Abbreviation:** mRS, modified Rankin Scale; SAI, stroke-associated infection.
